# Supplementary material for: Nitrates vs. Other Types of Vasodilators and Clinical Outcomes in Patients with Vasospastic Angina: A Propensity Score-Matched Analysis
Source: MDPI journal article supplement (doi:10.3390/jcm11123250), 2022-06-07
Supplement: s1 [file s1]

## **SUPPLEMENTAL MATERIAL**

Supplementary Table S1. Coronary artery spasm and associated characteristics after provocation test according to vasodilator

|                                           | All (n = 1048) | Nitrates<br>(n = 239) | Other types of<br>vasodilator<br>(n = 809) | <i>p</i> value |
|-------------------------------------------|----------------|-----------------------|--------------------------------------------|----------------|
| <b><i>Location of spasm</i></b>           |                |                       |                                            |                |
| Location of spasm<br>(>2.5 mm vessel) LM  | 4 (0.4)        | 0 (0.0)               | 4 (0.5)                                    | 0.579          |
| Location of spasm<br>(>2.5 mm vessel) LAD | 511 (48.9)     | 126 (52.7)            | 385 (47.8)                                 | 0.184          |
| Location of spasm<br>(>2.5 mm vessel) LCx | 235 (22.5)     | 46 (19.2)             | 189 (23.5)                                 | 0.169          |
| Location of spasm<br>(>2.5 mm vessel) RCA | 509 (48.8)     | 127 (53.1)            | 382 (47.5)                                 | 0.123          |
| Associated ECG<br>change                  | 138 (13.2)     | 36 (15.1)             | 102 (12.6)                                 | 0.324          |
| Associated chest pain                     | 620 (59.2)     | 164 (68.6)            | 456 (56.4)                                 | 0.001          |
| Associated<br>arrhythmia <sup>†</sup>     | 149 (14.2)     | 28 (11.7)             | 121 (15.0)                                 | 0.207          |
| Associated cardiac<br>arrest              | 3 (0.3)        | 0 (0.0)               | 3 (0.4)                                    | 1.000          |

<sup>†</sup> Atrial fibrillation, atrial flutter, ventricular fibrillation, ventricular tachycardia, or atrioventricular block.

ECG, electrocardiography; LAD, left anterior descending coronary artery; LCx, left circumferential artery; LM, left main coronary artery; RCA, right coronary artery.

Supplementary Table S2. Time to composite clinical outcome in nitrate group and other types of vasodilator group

| Time to event | Nitrates<br>(n = 10) | Other types of vasodilator<br>(n = 13) |
|---------------|----------------------|----------------------------------------|
| Patient #1    | 40days               | 40days                                 |
| Patient #2    | 47days               | 70 days                                |
| Patient #3    | 227days              | 96 days                                |
| Patient #4    | 230 days             | 119 days                               |
| Patient #5    | 241 days             | 171 days                               |
| Patient #6    | 269 days             | 295 days                               |
| Patient #7    | 330 days             | 327 days                               |
| Patient #8    | 333 days             | 331 days                               |
| Patient #9    | 340 days             | 359 days                               |
| Patient #10   | 357 days             | 366 days                               |
| Patient #11   |                      | 369 days                               |
| Patient #12   |                      | 380 days                               |
| Patient #13   |                      | 380 days                               |

Supplementary Table S3. One-year clinical event rate of patients with VA according to types of vasodilator in other types of vasodilator

|                                                          | Nicorandil<br>(n = 521) | Molsidomine<br>(n = 177) | Trimetazidine<br>(n = 111) | <i>p</i> value* |
|----------------------------------------------------------|-------------------------|--------------------------|----------------------------|-----------------|
| Composite events                                         | 12 (3.1)                | 1 (0.8)                  | 0 (0.0)                    | 0.118           |
| ACS                                                      | 9 (2.3)                 | 0 (0.0)                  | 0 (0.0)                    | 0.094           |
| Cardiac death                                            | 0 (0.0)                 | 1 (0.6)                  | 0 (0.0)                    | 0.484           |
| VT or VF                                                 | 1 (0.3)                 | 0 (0.0)                  | 0 (0.0)                    | 0.772           |
| AV block                                                 | 2 (0.5)                 | 0 (0.0)                  | 0 (0.0)                    | 0.595           |
| All-cause death                                          | 0 (0.0)                 | 1 (0.8)                  | 1 (1.2)                    | 0.127           |
| Readmission or<br>emergency room visits<br>due to angina | 41 (10.5)               | 21 (17.4)                | 3 (3.7)                    | 0.009           |

ACS, acute coronary syndrome; AV, atrioventricular; VA, vasospastic angina; VF, ventricular fibrillation; VT, ventricular tachycardia

\* Chi-square test

Supplementary Table S4. Baseline characteristics after propensity matching

|                                                    | All (n = 348) | Nitrate<br>(n = 174) | Other types of<br>vasodilator<br>(n = 174) | p value |
|----------------------------------------------------|---------------|----------------------|--------------------------------------------|---------|
| Age, years                                         | 52.1 ± 11.3   | 53.5 ± 11.1          | 52.8 ± 11.4                                | 0.585   |
| Male, n (%)                                        | 237 (68.1)    | 119 (68.4)           | 118 (67.8)                                 | 1.000   |
| BMI, kg/m <sup>2</sup>                             | 24.7 ± 3.6    | 24.7 ± 3.8           | 24.8 ± 3.4                                 | 0.815   |
| SBP, mmHg                                          | 126.5 ± 18.5  | 127.4 ± 19.6         | 125.6 ± 17.4                               | 0.372   |
| DBP, mmHg                                          | 77.7 ± 12.7   | 78.2 ± 13.8          | 77.2 ± 11.5                                | 0.483   |
| Previous CAD, n (%)                                | 23 (6.6)      | 12 (6.9)             | 11 (6.3)                                   | 0.829   |
| Diabetes mellitus, n<br>(%)                        | 22 (6.3)      | 14 (8.0)             | 8 (4.6)                                    | 0.186   |
| Hypertension, n (%)                                | 145 (41.7)    | 78 (44.8)            | 67 (68.5)                                  | 0.232   |
| Dyslipidemia, n (%)                                | 70 (20.1)     | 35 (20.1)            | 35 (20.1)                                  | 1.000   |
| Alcohol drinking, n<br>(%)                         | 205 (58.9)    | 103 (59.2)           | 102 (58.6)                                 | 1.000   |
| Current smoking, n<br>(%)                          | 138 (39.7)    | 67 (38.5)            | 71 (40.8)                                  | 0.661   |
| <b><i>Previous cardiovascular medication</i></b>   |               |                      |                                            |         |
| Antiplatelet, n (%)                                | 49 (14.1)     | 26 (14.9)            | 23 (13.2)                                  | 0.644   |
| Statin, n (%)                                      |               |                      |                                            |         |
| CCB, n (%)                                         | 65 (18.7)     | 35 (20.1)            | 30 (17.2)                                  | 0.492   |
| <b><i>Clinical diagnosis before ergonovine</i></b> |               |                      |                                            |         |
| Angina, n (%)                                      | 324 (93.1)    | 166 (65.4)           | 158 (90.8)                                 | 0.091   |
| Myocardial infarction,<br>n (%)                    | 10 (2.9)      | 3 (1.7)              | 7 (4.0)                                    | 0.337   |
| Cardiac arrest, n (%)                              | 2 (0.6)       | 2 (1.1)              | 0 (0.0)                                    | 0.499   |
| Syncope, n (%)                                     | 5 (1.4)       | 4 (2.3)              | 1 (0.6)                                    | 0.371   |
| VT or VF, n (%)                                    | 1 (0.3)       | 1 (0.6)              | 0 (0.0)                                    | 1.000   |
| AV block, n (%)                                    | 1 (0.3)       | 0 (0.0)              | 1 (0.6)                                    | 1.000   |

AV, atrioventricular; BMI, body mass index; CAD, coronary artery disease; CCB, calcium channel blocker; DBP, diastolic blood pressure; SBP, systolic blood pressure; VF, ventricular fibrillation; VT, ventricular tachycardia.

Supplementary Table S5. One-year clinical event rate of patients with good drug compliance

|                  | All (n = 491) | Nitrate<br>(n = 104) | Other types of<br>vasodilator<br>(n = 387) | <i>p</i> value |
|------------------|---------------|----------------------|--------------------------------------------|----------------|
| Composite events | 10 (2.0)      | 4 (3.8)              | 6 (1.6)                                    | 0.231          |
| ACS              | 7 (1.4)       | 2 (1.9)              | 5 (1.3)                                    | 0.643          |
| Cardiac death    | -             | -                    | -                                          | -              |
| VT or VF         | 1 (0.2)       | 1 (1.0)              | 0 (0.0)                                    | 0.212          |
| AV block         | 2 (0.4)       | 1 (1.0)              | 1 (0.3)                                    | 0.379          |
| All-cause death  | 2 (0.4)       | 1 (1.0)              | 1 (0.3)                                    | 0.379          |

ACS, acute coronary syndrome; AV, atrioventricular; VF, ventricular fibrillation; VT, ventricular tachycardia.

Supplementary Table S6. One-year clinical event rate of patients with poor-compliance during 1 year

|                  | All (n = 285) | Nitrate<br>(n = 82) | Other types of<br>vasodilator<br>(n = 203) | <i>p</i> value |
|------------------|---------------|---------------------|--------------------------------------------|----------------|
| Composite events | 13 (4.6)      | 6 (7.3)             | 7 (3.4)                                    | 0.156          |
| ACS              | 10 (3.5)      | 6 (7.3)             | 4 (2.0)                                    | 0.036          |
| Cardiac death    | 1 (0.4)       | 0 (0.0)             | 1 (0.5)                                    | 1.000          |
| VT or VF         | 1 (0.4)       | 0 (0.0)             | 1 (0.5)                                    | 1.000          |
| AV block         | 1 (0.4)       | 0 (0.0)             | 1 (0.5)                                    | 1.000          |
| All-cause death  | 1 (0.4)       | 0 (0.0)             | 1 (0.5)                                    | 1.000          |

ACS, acute coronary syndrome; AV, atrioventricular; VF, ventricular fibrillation; VT, ventricular tachycardia.
